# Supplementary material for: Bacillus thuringiensis Cry1Da_7 and Cry1B.868 Protein Interactions with Novel Receptors Allow Control of Resistant Fall Armyworms, Spodoptera frugiperda (J.E. Smith)
Source: PubMed Central journal article supplement (PMC6677855; doi:10.1128/aem.00579-19), 2019-08-01
Supplement: AEM.00579-19-s0001.pdf [file AEM.00579-19-s0001.pdf]

1 **Novel receptor interaction of *Bacillus thuringiensis* Cry1Da\_7 and Cry1B.868**  
2 **proteins allow control of resistant fall armyworm, *Spodoptera frugiperda* (J.E.**  
3 **Smith)**

4 Yanfei Wang<sup>1</sup>, Jinling Wang<sup>1</sup>, Xiaoran Fu<sup>1</sup>, Jeffrey R. Nageotte<sup>1</sup>, Jennifer Silverman<sup>1</sup>,  
5 Eric C. Bretsnyder<sup>1</sup>, Danqi Chen<sup>1</sup>, Timothy J. Rydel<sup>1</sup>, Gregory J. Bean<sup>1</sup>, Ke Sherry Li<sup>1</sup>,  
6 Edward Kraft<sup>1</sup>, Anilkumar Gowda<sup>2</sup>, Autumn Nance<sup>1</sup>, Robert G. Moore<sup>1</sup>, Michael J.  
7 Pleau<sup>1</sup>, Jason S. Milligan<sup>1</sup>, Heather M. Anderson<sup>2</sup>, Peter Asimwe<sup>2</sup>, Adam Evans<sup>1</sup>,  
8 William J. Moar<sup>2</sup>, Samuel Martinelli<sup>2</sup>, Graham P. Head<sup>2</sup>, Jeffrey A. Haas<sup>1</sup>, James A.  
9 Baum<sup>1</sup>, Fei Yang<sup>3</sup>, David L. Kerns<sup>3</sup>, and Agoston Jerga<sup>1</sup>

10

11 <sup>1</sup>From the Plant Biotechnology Program, Bayer Crop Science, Chesterfield, MO 63017

12 <sup>2</sup>From the Regulatory Science Program, Bayer Crop Science, Chesterfield, MO 63017

13 <sup>3</sup>From the Department of Entomology, Texas A&M University, Entomology Research  
14 Laboratory 103J, College Station, TX 77843-2475

15

16 \*Running title: New insecticidal proteins to combat *Bt*-resistant fall armyworm

17

18 To whom correspondence should be addressed: Agoston Jerga, GG4448-A, Bayer  
19 Crop Science, 700 Chesterfield Parkway West, Chesterfield, MO 63017, USA, Tel.:  
20 (636)737-7139; E-mail: [agoston.jerga@bayer.com](mailto:agoston.jerga@bayer.com)

21

22 **Supplementary Figure 1.**

**A** Cry1B.868

```

1 MTSNRKNENE IINALSIPAV SNHSAQMNLS TDARIEDSLC IAEGNNIDPF
51 VSASTVQGTI NIAGRLGLVL GVPFAGQIAS FYSFLVGLW PRGRDPWEIF
101 LEHVEHLIRQ QVTENTRDTA LARLQGLGNS FRAYQQSLED WLENRDDART
151 RSVLYTQYIA LELDFLNAMP LFAIRNQEVP LLMVYAQAAN LHLLLLRDAS
201 LFGSEFGLTS QEIQRYRERQ VEKTRREYSDY CARWYNTGLN NLRGTNAESW
251 LRYNQFRRLD TLGVLDLVAL FPSYDTRVYP MNTSAQLTRE IYTDPIGRTN
301 APSGFASTNW FNNNAPSFS A IEAAVIRPPH LLDFPEQLTI FSVLSRWSNT
351 QYMNWVGHHR LESRTIRGSL STSTHGNTNT SINPVTLQFT SRDVTRETSF
401 AGINILLTTP VNGVPWARFN WRNPLNSLRG SLLYTIIGYTG VGTQLFDSST
451 ELPPETTERP NYESYSHRLS NIRLISGNLT RAPVYSWTHR SADRTNTISS
501 DSIHQIPLVK GFRVWGGTSV ITGPGFTGGD LLRRNTFGDF VSLQVNIISP
551 ITQRYRLRFR YASSRDARVI VLTGAASTGV GQVSVNMLP QKTMEIGENL
601 TSTRFRYTFD SNPFSFRAMP DIIIGSEQPL FGAGSISSGE LYIDKIEIIL
651 ADATFEAESD LERAQKAVNE LFTSSNQIGL KTDVTDYHID QVSNLVECLS
701 DEFCLDEKKE LSEKVKHAKR LSDERNLLQD NFRGINRQL DRGWRGSDTI
751 TIQGGDDYFK ENYVTLGTF DECYPTYLYQ KIDESKLYAK TRYQLRGYIE
801 DSQDLIYLVK RYNAKHETVN VPGTGSLLWP SAPSPIKCA HSHSHFSLDI
851 DVGCTDLNED LGVWVIFKIK TQDGHARLGN LEFLEEKPLV GEALARVKRA
901 EKKWRDKREK EAKESVDALF VNSQYDRLQA DTNIAMIHAA DKRWHRIREA
951 DKRVHSIRWA YLPELSVIPG VNAAI FEELE GRIFTAFSLY DARNVIKNGD
1001 FNNGLWCWNV KGHVDEVEGN NHRSVLVIPE WEAEVSQEVR VCPGRGYLLR
1051 VTAYKEGYGE GCVTIHEIED NTDELKFSNC VEVEEVPNNT VTCNDYATQ
1101 EYEGYTYTSR NGSVDAYAS NPSVPADYAS VYEEKYATDG RRENPCESNR
1151 GYGDYTPLPA GYVTKLEYF PETDKVWIEI GETEGTFIVD SVELLMLME
    
```

**B** Cry1Be2

```

1 MTSNRKNENE IINALSIPAV SNHSAQMNLS TDARIEDSLC IAEGNNIDPF
51 VSASTVQGTI NIAGRLGLVL GVPFAGQIAS FYSFLVGLW PRGRDPWEIF
101 LEHVEHLIRQ QVTENTRDTA LARLQGLGNS FRAYQQSLED WLENRDDART
151 RSVLYTQYIA LELDFLNAMP LFAIRNQEVP LLMVYAQAAN LHLLLLRDAS
201 LFGSEFGLTS QEIQRYRERQ VEKTRREYSDY CARWYNTGLN NLRGTNAESW
251 LRYNQFRRLD TLGVLDLVAL FPSYDTRVYP MNTSAQLTRE IYTDPIGRTN
301 APSGFASTNW FNNNAPSFS A IEAAVIRPPH LLDFPEQLTI FSVLSRWSNT
351 QYMNWVGHHR LESRTIRGSL STSTHGNTNT SINPVTLQFT SRDVTRETSF
401 AGINILLTTP VNGVPWARFN WRNPLNSLRG SLLYTIIGYTG VGTQLFDSST
451 ELPPETTERP NYESYSHRLS NIRLISGNLT RAPVYSWTHR SADRTNTISS
501 DSIHQIPLVK GFRVWGGTSV ITGPGFTGGD LLRRNTFGDF VSLQVNIISP
551 ITQRYRLRFR YASSRDARVI VLTGAASTGV GQVSVNMLP QKTMEIGENL
601 AEFVVGISAS GSQTAGISIS NNAGRQTFHF DKIEFIPITA FEAEYDLER
651 AQEAVNALFT NTPRRLKGT VTDYHIDEVS NLVACLSDFE CLDEKRELE
701 KVKYAKRLSD ERNLLQDPNF TSINKQDFEN SNNEQSNFTS IHEQSEHGW
751 GSENIITQEG NDVFKENYVT LPTGFNECYP TYLYQKIGEA ELKAYTRYL
801 SGYIEDSQDL EIYLIRYNAK HETLDVPGTE SVWPLSVESV IGRGCEPNRC
851 APHFENPDL DCSRDGKCA HSHSHFSLDI IDVGCIDLHE NLGWWVVKFI
901 KTGQGHARLG NLEFLEEKPL LGEALSRVKR AKKWRDKRE KQLQETKRVY
951 TEAKEVDAL FVDSQYDRLQ ADTNIGMIHA ADKLVHIRE AYLSLSVQPS
1001 GVNAEIFEEL EGRIITAI SL YDARNVVKNG DFNNEGLACWN VKGHVDSVPS
1051 HHRSVLVIPE WEAEVSQAVR VCPGRGYLLR VTAYKEGYGE GCVTIHEIED
1101 NTDELKFSNC EEEVYPTDT GTCNDYTAHQ RRENPCESNR GYEDAYEVD
1151 TASVNYKPTV EETETDVRN DNHCYDRGY VNYPPVPAGY MTKLEYFPE
1201 TDKVWIEIGE TEGKIVDSV ELLLME
    
```

**C**

Cry1Ca1

```

1 MEENNQNCI PYNCLSNPEE VLLDGERIST GNSSIDISLS LVQFLVSNFV
51 PGGGFLVGLI DFVWVIGVPS QWDAFLVQIE QLINERIAEF ARNAAIANLE
101 GLGNFNFIY EAFKEWEEDP NNPETRTRVI DRFRILDGLL ERDIPSPFRIS
151 GFEVPLLSVY AQANLHLAI LRDSVIFGER WGLTITINVE NYNRLIRHID
201 EYADHCANTY NRGLNLPKLS TYQDWITYNR LRDLTLTVL DIAAFFPNYD
251 NRRYPIQVPG QLTREVYTD P LINFNPLQLS VAQLPTFNVM ESSIRRNPHL
301 FDILNMLTIF TDWFSVGRNF YWGHVRVSS LIGGGNITSP IYGREANQEP
351 PRSFTFNGPV FRTLNSPTLR LLQQPWPAPP FNLRGVEGVE FSTPTNSFTY
401 RGRGTVDVSLT ELLPEDNSVP PREGYSHRLC HATFVQSRGT PFLTGTGVVFS
451 WDRSATLITN TIDPERINQI PLVKGFRVWG GTSVITGPGF TGGDILRRNT
501 FGDFVSLQVN INSPITQRIR LRFYASSRD ARVIVLTGAA STGVGGQVSV
551 NMPLQKTM EI GENLTSRTRF YTFDSNPF SF RANPDIIGIS EQPLFGAGSI
601 SSGELYIDKI EI ILADATFE AESDLERAQK AVNALFTSSN IQIGLKTVDTD
651 YHIDQVSNLV DCLSDFCFLD EKRELSERVK HAKRLSDERN LLQDPNFRGI
701 NRQPDGRWGR STDITIQGGD DVFKENYVTL PGTVDECYPT YLYQKIDESK
751 LKAYTRYELR GYIEDSQDLE IYLIRYNAK EIVNVPGTGS LWPLSAQSPI
801 GKCGEPNRC PHLEWPNLDL CSCRDGKCA HSHSHFSLDI DVGCTDLNED
851 LGVWVIFKIK TQDGHARLGN LEFLEEKPLL GEALARVKRA EKKWRDKREK
901 LQLETNIVYK EAKESVDALF VNSQYDRLQA DTNIAMIHAA DKRWHRIREA
951 YLPELSVIPG VNAAI FEELE GRIFTAFSLY DARNVIKNGD FNNGLWCWNV
1001 KGHVDEVEGN NHRSVLVIPE WEAEVSQEVR VCPGRGYLLR VTAYKEGYGE
1051 GCVTIHEIED NTDELKFSNC VEVEEVPNNT VTCNDYATQ EYEGYTYTSR
1101 NQGYDEAYGN NPSVPADYAS VYEEKYATDG RRENPCESNR GYGDYTPLPA
1151 GYVTKLEYF PETDKVWIEI GETEGTFIVD SVELLMLME
    
```

**D**

Cry1Ab3

```

1 MDNPNINEC IPYNCLSNPE VEVLLGGERIE TGYTPIDISL SLTQFLLESEF
51 VPGAGFLVGL VDIWVIFGP SQWDAFLVQI EQLINQRIEE FARNQAI SRL
101 EGLSNLYQIY AESFREWEAD PTPALREEM RIQFNDMNSA LTTAIPLFAV
151 QNYQVPLLSV YVQAANLHLS VLRDVSVFGQ RWGDAATIN SRYNDLTRLI
201 GNYTDHAWR VNTGLERVWG PDSRDWRIRYN QFRLELTLV LDIIVSLFNY
251 DSRTYPIRTV SQTREIYTN PVLEMFDCGS RGSAGIEGS IRSPHMLDIL
301 NSITTYTDAH RGEYVWSGHQ IMASVVGFSG PEFTTPLYGT MGNAAPQORI
351 VAQLGQGVYR TLSSTLYRRP FNIGINNQQL SVLDGTFEAY GTSSNLSAV
401 YRKSQTVDSL DEIPQNNNV PRQGFSHRL SHVSMFRSGF SNSVSIIRA
451 PMSWIMHRS EFNII PSSQ ITQIPLTKST NLGSGTSVVK GPGTGGDIL
501 RRTSPGQIST LRNVITAPLS QRYRVRIRYA STTNLQFHTS IDGRPINQGN
551 FSATMSSGNS LQSGSFRTVG FTFPNFMSG SSVTTLSAHV FNSGNEVYID
601 RIEFVPAEVT FEAEYDLERA QKAVNELFST SNQIGLKTVD TDYHIQVSN
651 LVECLSDFCFL DDEKLESEK VKHAKRLSDE RNLQDPNFR GINQLDRGW
701 RGSITDITIQ GDDVFKENYV TLLGTFDECY PTYLYQKIDE SKLKAYTRYQ
751 LRGYIEDSQDL LEIYLIRYNA KHETVNVPGT GSIWPLSAPS PIKCAHSH
801 HFSLDIDVGC TDNEDLGVW VIFKIKTQDG HARLGNLEFL EEPPLVGEAL
851 ARVKRAEKWK RDKREKLEWE TNVIVKKAKE SVDALVFNQ YDRIQADNTI
901 AMIHAADKRW HSRREAYLPE LSVIPGVNAA IFEELERLIF TAFSLYDARN
951 VIKNGDFNNG LSCWNVKGVH DVEEQNNHRS VLIVPEWFAE VSQEVVRCPG
1001 RGYILRVTA YKEGYGECVT IHEIENNTDE LKFSNCVVEE VYPPNVTCTN
1051 DYATNQEYEE GTYTSRNRGY DGAYSSNSV PADYASAYEE KAYDGRDRN
1101 PCSNRGYGD YTPLAGYVT KELEYFPETD KWVIEIGETE GYVIVDSVEL
1151 LLME
    
```

23

24

25 **Supplementary Figure 2.**

26

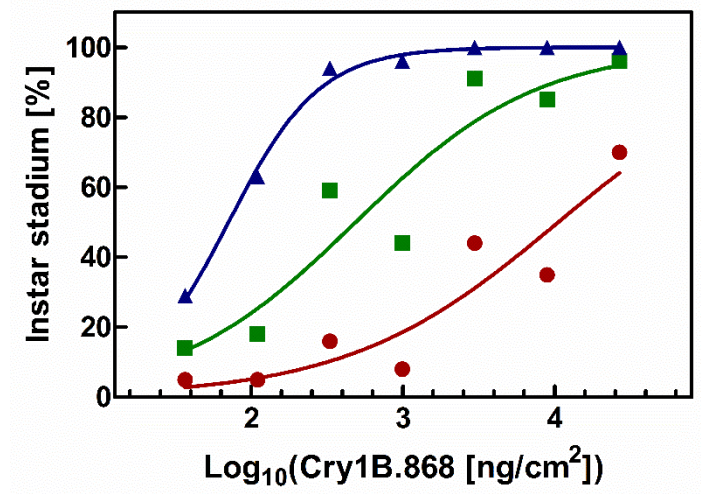

27

28

29

30

31 **Supplementary Figure 3.**

| Protein   | Slope | MIC <sub>50</sub> (µg/cm <sup>2</sup> ) | 95% CI      |
|-----------|-------|-----------------------------------------|-------------|
| Cry1Be2   | 1.55  | 3.23                                    | 2.16 – 5.06 |
| Cry1B.868 | 1.63  | 0.43                                    | 0.28 – 0.62 |

32

33

34 **Supplementary Figure 4.**

**A**

Cry1Da\_844

```

1 MEINNQNCV PYNCLSNPKE IILGEERLET GNTVADISLG LINFLYSNFV
51 PGGGFIVGLL ELIWGFIGPS QWDIFLAQIE QLISQRIEEF ARNQAIRSLE
101 GLSNLYKVYV RAFSDWEKDP TNPALREEMR IQFNDMNSAL ITAIPLFRVQ
151 NYEVALLSVY VQAAHLHLSI LRDVSVFGER WGYDTATINN RYSDLTSLIH
201 VYTNHCVDYV NQGLRRLEGR FLSDWIVYNR FRRLTISVL DIVAFFPNYD
251 IRTYPIQTAT QLTREVYLDL PFINENLSPA ASYPTFSAAE SAIRSPHLV
301 DFLNSFTIYT DSLARYAYWG GHLVNSFRGT TTNLIRSPLE YGREGNTERP
351 VTITASPSVP IFRTLSTYTG LDNSNPVAGI EGVEFQNTIS RSIYRKS GPI
401 DSFSELPDQD ASVSPAIGYS HRLCHATFLE RISGPRAGT VFSWTHRSAS
451 PTNEVSPSRI TQIPWVKAHT LASGASVIKQ PGFTGGDILT RNSMGELGTL
501 RVTFTGRLLPQ SYIRFRFYAS VANRSQGFTRY SQPPSYGISF PKTMDAGEPL
551 TSRSFAHTTL FTPITFSRAQ EEFDLYIQSG VYIDRIEFIP VTATFEAEYD
601 LERAQKVVNA LFTSTNQLGL KTDVTDYHID QVSNLVACLS DEFCLDEKRE
651 LSEKVKHAKR LSDERNLQD PNFGRINRQP DRGWRGSDTI TIQGGDDVFK
701 ENYVTLPGTF DECYPTYLYQ KIDESKLRAY TRYQLRGYIE DSQDLEIYLI
751 RYNAKHEIVN VPGTGSWPL SAPSPIKCA HSHHFLSDI DVGCTDLNED
801 LGWVYIFKIK TQDGHARLGN LEFLEEKPLV GEALARVKKR EKWWRDKREK
851 LEWETNIVDQ EAKESVDLQV WEAEVSVQEVV VCPGRGYLLR VTAYKEGYGE
901 YLPELSVIGP VNAAFEELE GRIFATFSLY DARNVTKNGD FNLGSCWNV
951 KGHVDVBEQN NHRSVLVVPE WEAEVSVQEVV VCPGRGYLLR VTAYKEGYGE
1001 GCVTIHEIEN NDELKFSFNC VEVEEYFNNT VTCNDYATQD EEEYGTYSR
1051 NRGYDGYAES NSSVPADYAS AYEKAYTDG RRDNPCESNR GYGDYTPLEPA
1101 GYVTKLEYFY PETDKWVIEI GETEGTFIVD SVELLLMEE
    
```

**B**

Cry1Da1

```

1 MEINNQNCV PYNCLSNPKE IILGEERLET GNTVADISLG LINFLYSNFV
51 PGGGFIVGLL ELIWGFIGPS QWDIFLAQIE QLISQRIEEF ARNQAIRSLE
101 GLSNLYKVYV RAFSDWEKDP TNPALREEMR IQFNDMNSAL ITAIPLFRVQ
151 NYEVALLSVY VQAAHLHLSI LRDVSVFGER WGYDTATINN RYSDLTSLIH
201 VYTNHCVDYV NQGLRRLEGR FLSDWIVYNR FRRLTISVL DIVAFFPNYD
251 IRTYPIQTAT QLTREVYLDL PFINENLSPA ASYPTFSAAE SAIRSPHLV
301 DFLNSFTIYT DSLARYAYWG GHLVNSFRGT TTNLIRSPLE YGREGNTERP
351 VTITASPSVP IFRTLSTYTG LDNSNPVAGI EGVEFQNTIS RSIYRKS GPI
401 DSFSELPDQD ASVSPAIGYS HRLCHATFLE RISGPRAGT VFSWTHRSAS
451 PTNEVSPSRI TQIPWVKAHT LASGASVIKQ PGFTGGDILT RNSMGELGTL
501 RVTFTGRLLPQ SYIRFRFYAS VANRSQGFTRY SQPPSYGISF PKTMDAGEPL
551 TSRSFAHTTL FTPITFSRAQ EEFDLYIQSG VYIDRIEFIP VTATFEAEYD
601 LERAQKVVNA LFTSTNQLGL KTDVTDYHID QVSNLVACLS DEFCLDEKRE
651 LSEKVKHAKR LSDERNLQD PNFGRINRQP DRGWRGSDTI TIQGGDDVFK
701 ENYVTLPGTF DECYPTYLYQ KIDESKLRAY TRYQLRGYIE DSQDLEIYLI
751 RYNAKHEIVN VPGTGSWPL SAPSPIKCA HSHHFLSDI DVGCTDLNED
801 DGEKCAHSHS HFSLDIDVGC TDLNEDLVGW VIFKIKTQDG HARLGNLEFL
851 EEKPLLGEAL ARVKRAEKKW RDKRETLQLE TTVIYKEAKE SVDALFVNSQ
901 YDRLQADTNI AMIHAADKRV HRIREAYLPE LSVIPGVNAA IFEELERIF
951 TAFSLYDARN IIKNGDFNNG LLCWNVKGVH VEVEEQNHRS VLVIPWEWAE
1001 VSQEVRCVCP RGYLLRVYAY KEGYGECCVT IHEIENNTDE LKFNVCVEEE
1051 VYPNNTVTICI NYTATQEEYE GTYSNRNGY DEAYGNNPVS PADYASVYEE
1101 KSYTDRRREN PCESNRGYGD YTPLPAGYVT KELEYFPETD KVVIEIGETE
1151 GTFIVDSVEL LLMEE
    
```

**C**

Cry1Ab3

```

1 MDNPNINEC IPYNCLSNPKE VEVLGGERIE TGYTPIDISL SLTQFLLESEF
51 VPGAGFVLGL VDIWGFIFGP SQWDAFLVQI EQLINQRIEE FARNQAIRSRL
101 EGLSNLYQIY AESFREWEAD PTNPALREEMR RIQFNDMNSA LTTAIPLFAV
151 QNYQVPLLSV YVQAAHLHLSI VLRDVSFVFG RWGFDAATIN SRYNDLTRLI
201 GNYTDHAVRW YNTGLERLVWG PDSRDWIRYN QFRRELTLTV LDIVSLFPNY
251 DSRTYPIRTV SOLTREIYTN PVLENVDGSG RGSAGGLEGS IRSPHMLDIL
301 NSITITDHAH RGEYYSWGHQ IMASPVGFSG PEFTFLYGT MGNAAPQRI
351 VAQLGQGVYR TLLSTLYRRP FNIINNQL SVLDGTEFAY GTSSNLPASV
401 YRKSQTVDSL DEIPQNNNV PPRQGFSHRL SHVSMFRSGF SNSSVSIIRA
451 PMFSWIHRSA EFNNIIPSSQ ITQIPLTKST NLGSGTSVVK GPFTGGDILT
501 RRTSPGQIST LRVNITAPLS QRYRVRIRYA STNLLQFHTS IDGRPINQGN
551 FSATMSGSGN LQSGSFRFTV FTTPFNFSNG SSVFTLSAHV FNSGNEVYID
601 RIEFVPAEVT FEAEYDLERA QKAVNELFTS SNQIGLKTQV TDYHIDQVSN
651 LVECLSEDFC LDEKLEKSEL VKHAKRLSDE RNLQDPNFR GINRQLDRGW
701 RGSSTDTIQ GDDVFKENYV TLLGTFDECY PTYLYQKIDE SKLKAYTRYQ
751 LRGYIEDSQD LEIYLIRYNA KHETVNVPTG GSLWPLSAPS PIKCAHSHS
801 HFSLDIDVGC TDLNEDLVGW VIFKIKTQDG HARLGNLEFL EEKPLVGEAL
851 ARVKRAEKKW RDKREKLEWE TINVYKEAKE SVDALFVNSQ YDRLQADTNI
901 AMIHAADKRV HSIREAYLPE LSVIPGVNAA IFEELERIF TAFSLYDARN
951 VIKNGDFNNG LSCWNVKGVH DVEEQNHRS VLVVPEWAE VSQEVRCVCP
1001 RGYLLRVYAY KEGYGECCVT IHEIENNTDE LKFNVCVEEE VYPNNTVTICN
1051 DYTATQEEYE GTYSNRNGY DGAYESNSSV PADYASVYEE KAYTDGRDN
1101 PCESNRGYGD YTPLPAGYVT KELEYFPETD KVVIEIGETE GTFIVDSVEL
1151 LLMEE
    
```

**D**

Cry1Da\_7

```

1 MEINNQNCV PYNCLSNPKE IILGEERLET GNTVADISLG LINFLYSNFV
51 PGGGFIVGLL ELIWGFIGPS QWDIFLAQIE QLISQRIEEF ARNQAIRSRL
101 GLSNLYKVYV RAFSDWEKDP TNPALREEMR IQFNDMNSAL ITAIPLFRVQ
151 NYEVALLSVY VQAAHLHLSI LRDVSVFGER WGYDTATINN RYSDLTSLIH
201 VYTNHCVDYV NQGLRRLEGR FLSDWIVYNR FRRLTISVL DIVAFFPNYD
251 IRTYPIQTAT QLTREVYLDL PFINENLSPA ASYPTFSAAE SAIRSPHLV
301 DFLNSFTIYT DSLARYAYWG GHLVNSFRGT TTNLIRSPLE YGREGNTERP
351 VTITASPSVP IFRTLSTYTG LDNSNPVAGI EGVEFQNTIS RSIYRKS GPI
401 DSFSELPDQD ASVSPAIGYS HRLCHATFLE RISGPRAGT VFSWTHRSAS
451 PTNEVSPSRI TQIPWVKAHT LASGASVIKQ PGFTGGDILT RNSMGELGTL
501 RVTFTGRLLPQ SYIRFRFYAS VANRSQGFTRY SQPPSYGISF PKTMDAGEPL
551 TSRSFAHTTL FTPITFSRAQ EEFDLYIQSG VYIDRIEFIP VTATFEAEYD
601 LERAQKVVNA LFTSTNQLGL KTDVTDYHID QVSNLVACLS DEFCLDEKRE
651 LSEKVKHAKR LSDERNLQD PNFGRINRQP DRGWRGSDTI TIQGGDDVFK
701 ENYVTLPGTF DECYPTYLYQ KIDESKLRAY TRYQLRGYIE DSQDLEIYLI
751 RYNAKHEIVN VPGTGSWPL SAPSPIKCA HSHHFLSDI DVGCTDLNED
801 DGEKCAHSHS HFSLDIDVGC TDLNEDLVGW VIFKIKTQDG HARLGNLEFL
851 EEKPLLGEAL ARVKRAEKKW RDKRETLQLE TTVIYKEAKE SVDALFVNSQ
901 YDRLQADTNI AMIHAADKRV HRIREAYLPE LSVIPGVNAA IFEELERIF
951 TAFSLYDARN IIKNGDFNNG LLCWNVKGVH VEVEEQNHRS VLVIPWEWAE
1001 VSQEVRCVCP RGYLLRVYAY KEGYGECCVT IHEIENNTDE LKFNVCVEEE
1051 VYPNNTVTICI NYTATQEEYE GTYSNRNGY DEAYGNNPVS PADYASVYEE
1101 KSYTDRRREN PCESNRGYGD YTPLPAGYVT KELEYFPETD KVVIEIGETE
1151 GTFIVDSVEL LLMEE
    
```

35

36

37 **Supplementary Figure 5.**

38

**A**

| Active core (D1-3) | Mutations in active core | PTX domain (D4-7) | Protein form tested | Insect | Slope | IC <sub>50</sub> [µg/cm <sup>2</sup> ] | 95% CI        |
|--------------------|--------------------------|-------------------|---------------------|--------|-------|----------------------------------------|---------------|
| Cry1Da_7           | S282V,Y316S,I368P        | Cry1Ab            | full-length         | CEW    | 4.03  | 0.063                                  | 0.051 – 0.078 |
| Cry1Da             | N/A                      | Cry1Ab            | full-length         | CEW    | 1.56  | 3.28                                   | 2.26 – 4.96   |

**B**

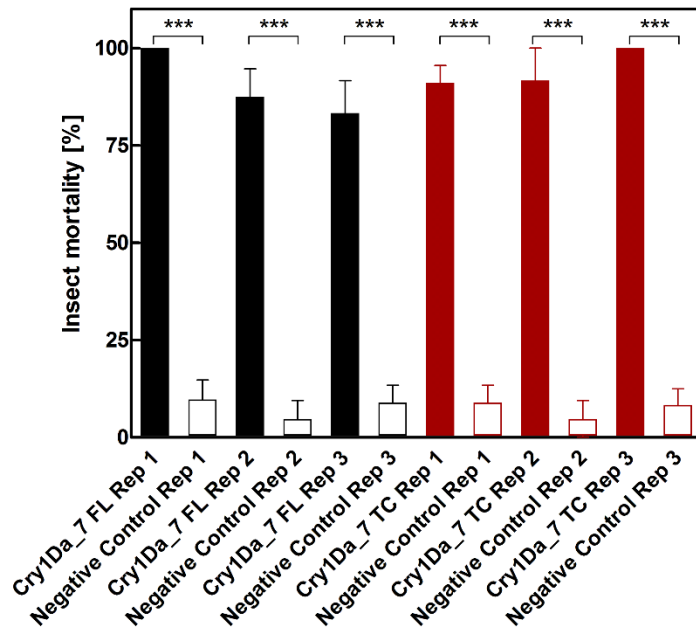

**C**

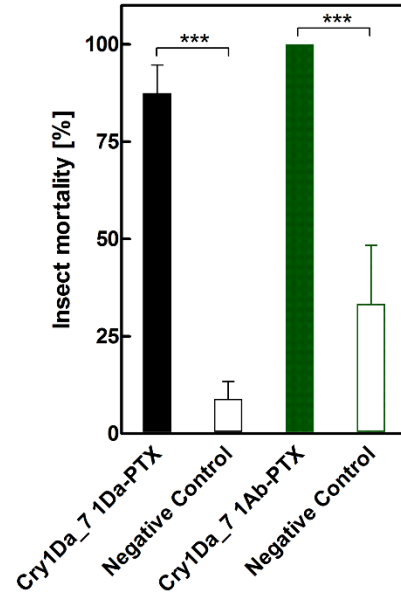

39

40

41

42 **Supplementary Figure 6.**

43 **>Sf.APN9 c-His**

44 MGLFRFVFLITIVSVTCKPVDLNIQTEVDELVLEPESKNVINVTEGTSNEVTNNALVMR  
45 NQVRPGMEVSSYAVEINANVEGGSSFDGRAIVNLRIFDHDTRDPVILNVAGLNINRVQY  
46 AIMGGSNLFADYSTDDDDQILEIEPGQLGSQYTLIEYSGSLNGVGKGLYRGTYGDN  
47 TYLAMNLHPTYARRVFPCMDEPTEASIIISFSFEGLEYNHLTSNAMLEENSQTHFRPLVG  
48 PPHLWGMIAHNFGTVNLPTSNNVLYARPGISNQESQASVAINFFFNNLNEWTQKPYFE  
49 VIENQDGRMNIMVLPDVSTDWNSLSTVGIWEPYVLMPEVHAVKQRAIALTKIAEAMSR  
50 QWFGYVIYPQNWRYEWVWAGFTTYSAYEMMRMFQADFATDINLLDVNTLFFVTEVIQE  
51 SLLRDAYINSNPLEPADDLFDDEDAIRDHVNGLVKVKSAAIMRMIRLVLGDDDDTDFIQIAA  
52 RALLNMRSLETINTLKFIDGINSELVDSTVGFDFEYLDPWITSNGYPLLRVETTFSGVLL  
53 HQTPFAFTNRESRLLPITYTTTSIEKNFDNIHPQFMLDINHNLNVFLDEEDWILFNIQGG  
54 GYYRVTYDTVLWERIIEALEDPDRREEIHPLNRATLVDDALNLRAGQLGYDIAFSVLS  
55 MEHETEYAVWKAFVRNMNFKKRLEAFVFDDDDLDPDIYLRMVRRTIPTFFEREIGFYP  
56 DTSINEPSMTSLTRGLVMDHACRAGYRPCIAAAVDWFYDPNNNEVVNPNIPIHEIRPAV  
57 YCTMVREGGEDAIEALLNRLEIEPTHYERVVILESLACSDDPDFINGYLMQTIIVSNPYS  
58 VEERVKIFAAVAESSYTNADLARDFMRLRVNEIRNMYGVKLEQLIYVLAENMADGDLT  
59 REFEIWWQSSFNLEDSQMTAERALAYVQENQNWGDKYTDDVYEWIDENHAHHHHH  
60 HHHHH

61

62 **>Sf.ABCb1**

63 MKDSKGNWQLKPGKKNENKLPDPLNEDVQKGQFSDTSSPSEAKAEVPSIPFITLFR

64 FASTRDKLFIIICALICSAVAAVSTPLNTLLLAYLLEAMVNYISIFGDADAFMKSLLNFAIY  
65 NAAVGAALVVLSYAATTLMNIAAYNQVYVIRQEYLKAALNQDFGYFDVHKTAEIANKMNS  
66 DIMKLEEGIGEKLATFFFYQASFLSSVIMALVKGWKLALLCLISFPVTMTLVGVAGLIAA  
67 SLSKKEAIATGKAGAI AEEVISAIRTVYAFSGQEKELDRYEGHLNDARKINVKKSFLNGL  
68 AMGCLFFCIFCAYALSFWFGYRLMVTGDYDVSTMIAVFFGVMTGSANFGISSTLMEVFGS  
69 ARGAGAHIFNMIDNVPTINPLQNRGTVPSDIEGNIELKNVEFHYPSPDPVPLKGVSIKV  
70 KRGQSVALVGHSGCGKSTIIQLISRFYDVVEGSVAIDGNDVRDLSVRWLREQIGLVGQEP  
71 VLFNTTVRENIRYGREMATNEEIEACARQANAHQFIMKLPKGYDTLVGERGASLSGGQKQ  
72 RIAIARALVRNPKILLLLDEATSALDTSSEAKVQKALDKAQEGRTTIVVAHRLSTIRNVDV  
73 IYVFKAGLVVECGNHEL MASKGHYYDMVMLQNLPGVDEQSPEKTKLSRETSIISEKDDE  
74 DEFLEFRNDDKEEDAAEAPDISFMRVLKLNKPEWKSVTLASICSLMSGFCMPLFAVIFGD  
75 FLALLDGDDPDEIQKGVSRLLALIFVGIGVFSGITNFIVVFFYGIAGEALTKRLRLMMFRK  
76 LLEMDIGFYDDKDNSTGALCARLSGEAAAVQGATGQRIGTVVQAVGTFGFALVLSLIFEW  
77 RVGLVALTFVPIIIFVLYKEGRMTYAATSGTVKVMETSSKIAVEAVANVRTVASLGREET  
78 FRREYSKQLRPALDTAVRSSHWRGLVFGMSRGVFNFVIASSLYGGTIIVNEGVPFEEVF  
79 KSAQALLMGATSAAQAFAPNFQKGIKAAGRIVILLGRQSKITDPVEPAVKHFNGTGEA  
80 SLQGIQFRYPTRPLVRVLKDLNLEIQRGKTVALVGASGCGKSTVIQLLERYYPD EDGIVA  
81 QDGVPLPKLNLVDARRAIGFVQQEPILFDRTIGENIAYGNNEARVSSDEVIEAAKQANIH

82 NFITSLPLGYDTNIGSKGTQLSGGQKQRVAIARALIRRPKMLLLDEATSALDTESEKVVQ  
83 EALDKAKAGRTCVMIAHRLSTVRDADVICVIHEGQVAEMGTHNELLELKGLYYNLNRRGY  
84 A  
85 **>Sf.ABCc2 c-flag**  
86 MMDKSNKNTAANGNGGQRAGEPKERVRKKPNILSRIFVWWIFPVLITGNKR DVEEDDLIV  
87 PSKKFNSERQGEYFERYWFEEVAIAEREDRPSLWKAMRRAYWLQYMPGAIFVLLISGLR  
88 TAQPLLFSQLLSYWSVDSEMSQQDAGLYALAMLGINFITMMCTHHNNLFVMRFSMKVKIA  
89 ASSLLFRKLLRMSQVSVGDVAGGKLVNLLSNDVARFDYAFMFLHYLWVWVPLQVGVVLYFV  
90 YDAAGWAPYVGLFGVILIMPLQAGLTKLTGVVRRMTAKRTDKRIKLMSEIINGIQVIKM  
91 YAWEKPFQLVVKAARAYEMSALRKSIFIRSMFLGFMLFTERSVMFLTVLTLALTGNMISA  
92 TLIYPIQQYFGIITMNVTLILPMAFASFSEMLISLERIQGFLLLDERSDIQITPKVVNGA  
93 GSKLFNNSKKEGGLETGIVLPTKYSPTANIARPMQDEPNMADYPVQLNKVNATWADLND  
94 NKEMTLKNISLRVRKNKLCVIGPVGSGKTSLLQLLLREL PVTSGNLSISGTVSYASQEP  
95 WLFPATVRENILFGLEYNVAKYKEVCKVCSLLPDFKQFPYGDLSLVGERGVSLSGGQRAR  
96 INLARAVYREADIYLLDDPLSAVDANVGRQLFDGCIKGYLSGKTCILVTHQIHYLKAADF  
97 IVVLNEGSVENMGSYDELMKTGTEFSMLLSQASEGSDTDKKERPAMMRGISKMSVKSDD  
98 EEGEEKVQVLEAEERQSGSLKWDVLRGYMKS VNSWCMVVM AFLVLVITQGAATTTDYWLS  
99 FWTNQVDGYIQTLPEGESPNPELNTQVGLLTTGQYLIVHGSVVLAIILTQVRILSFVVM



100 TMRASENLHNTIYEKLVAVMRFFDTNPSSGRVLRNRFKDMGAMDELLPRSMLETVQMYLS  
101 LASVLVLNIAIALPWTLIPTTVLMFIFVLLKQYINAAQAVKRLEGTTKSPVFGMINSTIS  
102 GLSTIRSSNSQDRLLNSFDDAQNHLHTSAFYTFLLGGSTAFGLYLDLCLLIYLGIIIMSIFIL  
103 GDFGELIPVGSVGLAVSQSMVLTMMMLQMAAKFTADFLGQMTAVERVLETKLPTEENMET  
104 GPTTPPKGWPSAGEVTFSNVYLKYSPPDPPVLKDLNFAIKSGWKVGVVGRGTGAGKSSLIS  
105 ALFRLSDITGSIKIDGLDTQGIKLLRSKISIIQPQEPVLFSSASLRYNLDPFDNYNDDDI  
106 WRALEQVELKESIPALDYKVSEGGTNFSMGQRQLVCLARAILRSNKILIMDEATANVDPQ  
107 TDALIQKTIRKQFATCTVLTIAHRLNTIMSDRVLVMDQGVAAEFDHPYILLSNPNSKFS  
108 SMVKETGDNMSRILFEVAKTKYESDSKTADYKDDDDK  
109 **>Sf.ABCc3**  
110 MDTKKGSKNDSKSKPPPKPKSVPNVFKRTLFCWMLPIFYFGNRRDLEESDLPPPKN  
111 MYQSKMLGDKLERSWLKEEHEAKLAGRKPFTKVLFKTFIWSYIPGGLMQATSIGLRT  
112 ASPLLFSQLLRYWAADSPVDRETAMYAISMILANWASSFMNHHGVLFCCQFGMKLR  
113 CAVGSLMFRKIMRMSNGSLGDTAAGKVVNLSNDLQRFDLMSVFLHYVWIIPLQIAAVIY  
114 LGYLQAGTAAFIGFAALIIIALPFQGGGLGQYLGKIRLRTAEKTDNRIKIMSEVINGIQVIKM  
115 YAWEIFQKVVGQKRAEELKEVKIATILRTVFLGFMMFTEAALFFTVLTYVLLGNVMS  
116 ANVFYPLQQFMSAAQVNITLILPMVLSFTAELLVSLGRVEKFLLLEDRLKLGHPPEETSS  
117 NLFRNMSADGIPETNGSIRPLSYHRKSEASPIEPGSEIQLKVPKFTRSVSYQEDSALVL  
118 HDVSASWTGDPNMMALKNISMRLRKGKLCIIGAVGSGKSSVLQLLLKELPSATGTISI  
119 YGKMSYACQEAWLFPSTVRENILFGLPFEPGKYKKVCRVCALEKDFKQFPYGDQTLV  
120 GERGVSLSGGQRARINLARAVYREADIYLLDDPLSAVDANVGRQLFEGCINGYLRGRT

121 RILVTHQIHFLKAADYIVVLNEGRIENMGTFDELVSSGKEFSMMLAQLQEGKEKDTESV  
 122 GSRSEEEKEKPTLKTMISSVNEGEEVQEFEAQKMKEEERQSGNLRWEVISAYFRSSGGHV  
 123 CFILFALLVVVLATTCAASVDYWVSYWTNQMAAYEESLGGESIEPGLDVQAGRFTVGG  
 124 YLTIHGCLVAALVLMVNLRVFPFAYLCVSASAKLHNQMFSTMLRGVMRFFDTSSSGRIL  
 125 NRFTKDMGSLDEILPRTLDDVLQIYGTLTAILVLNAIALYWTLVPSAVLLVLFQFMVRIYLK  
 126 AAQGIKRLEGTTKSPMFGTVTSSLSGISTIRASNAQERLIEQFDINQDLHTTSWNSYLN  
 127 GGTTFGFYLDTMCLVYMTTIIIFVFLFIDFGDAIPVGSVGLAVTQSNTLTLMLQHGARMLV  
 128 EFLAQLTSVERILEYTRIDTEPDLFQGKVEPPNWPYQGRIEFQNVSLRYAPNEQPVLK  
 129 NLNIVIESGNKIGIVGRTGAGKSSLISALFRFAYLDGLISIDGLDTSLSRQGLRSKISIIPE  
 130 PILFSATIRYNLDPFDIYSDDDLWRALEQVDLKSAPSLDFKVTGGSNFSSVGQRQLMC  
 131 LARAVLRSNQILIMDEATANVDPQTDNFIQETIRRQFVSCTVLTIAHRLNTIMDSKVLV  
 132 MSSGQVAEYDHPYVLLSDPNSHFSAMVRETGEKNSANLFQVAKDAYFQSNLKENARD  
 133 YKDDDDKX

134 **>Sf.APN1 nested His**

135 MASRWFNLLLGVILLQSVLAFGPIDVTDAAHHHHHHEWIEYMGLINNPYRLPTTTRPLHY  
 136 KVRQLQPNLDQDFELNGDVEINIKVESGNQPINEIKLHCQDMVINSLTVTSTTNTQVNLAQ  
 137 GTQFVCEETTSFLTPTTTQLLNGNEYIIKISFVGKLQSGMRGFYRSWFFDENKQKRWMA  
 138 TTQFQPGHARQAFPCYDEPGFKATFDIILVRDDSLISLSNMPIRETITSTLYPQKKEDIY  
 139 YTTPIMSTYLLAFIVADYKRIESGTNVNRPFHIYARGNVGDTGKYSLEVGEKLLTLMESY  
 140 TQYNYTMMASHMEMKQAAIPDFSAGAMENWGLLTYREALILYDPENSNNFYKQRIANIIS  
 141 HEIAHMWFGNLVTCAWWDTLWLNEGFARYYQYYMTDKAEPHMGFKTRFIVEQLQMAMLSD

142 SFSNAHALTNPAVSDPDSVSNHFSTITYAKGASILRMTEHLLGGDTYEKGLREYLKKREF  
143 NTAEPKDLFESLDAAANADNSLADYDDMTIAKYFASWSEKAGHPLLVHVDHASGRMTVV  
144 QTQFDVNSGVSSDNGLWHIPLTWTRAGNPEFENLKPSEFMSGPLKIINRGSTGREWVIFN  
145 KQQSGFYRVNYDATTWALLTQALRSNEREAIHEYNRAQIVDDVFLARSNILSYTRALNI  
146 LSFLEFEDKYAPWVAAITGFNFALRRLAHKTEEQQKLKDIIFKSSAAIIQRLGYTEASNA  
147 DPLFMDNLLRMHLMTFLCNAGHAQCSQTGREYFKAWRESGTRIPPNMRPWVYCEGLRTGD  
148 LADFDYFWNRYVDEDLSNEKVVMIAGAAGCTGNTEALHKFLSVIVDPKPTEQSIELIRPQD  
149 YSAAISSAVTSNEYNTMKVLEWLKDNPSHLQNGNGVSLLRSAASRLLNEADIFKVETWFA  
150 TITSDEAIQAIKDIATSNNNIKWYNSRVGEFSDYFETGYFDDLTGGSETPDPTTPEPTT  
151 AEPTTPEPTTPEPTTAEPTTAEPTTDESTPAEPTTAEPTTDEPEPGSANIASLSFFTLLV  
152 TLIINMV  
153 **>Sf.ABCa3 c-flag**  
154 MRLVPKQASPFQAKFRLLMWKNFLQQRHRTQTVLEILLPVLMTLVLILRWQIEPAERET  
155 QTYPPFRANTLNFSTVVLFGLDPCNVSIAYSPTSPVLEDVVRNAITNLLIQNMEDIARL  
156 PIEIELPPTIEINSTAILDWIKSRIRVQAYNNSHETRGIYIEEENTRRVIAVVEFDDKLY  
157 GAESLSNNLSYSRLRFPERPRLNLSLFQTGGRTWRDVAFPVFETPGPRFSKSWEGGNDPGY  
158 VNEMFIALQQVISTELISRSTGVNMSEFTVFLQRYPHPPYIRDMALDLLQFMFPMFIMLS  
159 FSYTAINITRAVTVEKELQLKETMKIMGLPTWLHWTAWTCKQFVLLVSASLTVILLKIN

160 WFTNEDGFSEYTVFTNTPWTVLMFFTMPLYLTCVIFFSFMMSSFFSKASTAALCTVVVWFL  
161 TYIPAFLLAMDIEMSTTVQVFTCLSINSAMSYGFQLLLAKESTGGLQWGDFFMSAPGTDSN  
162 RFVFGHVIMLVVDCFVYMLVTLYFEQVMPGPFGTPKRWYFPFQLRFWFPHYKPGTVLVL  
163 ENENSEFEDIKEKEPNEHEVGVKMNNLTKIFGANTAVNNLSLNIYDDQITVLLGHNGAG  
164 KSTTISMLTGNLEVTRGTVTVAGYDMTHETYAARAHIGLCPQHNVLFNELTVREHLEFFA  
165 RLKGFRTGAELKSEIDTLIEKLELQDKRDYPSNGLSGGQKRRLCVGIALSGAARVLLDEP  
166 TSGMDPSSRRALWELLQKEKKGRSMILTTHFMDEADILGDRVAIMAQGRQLQCVGSPYFLK  
167 RHYGVGYTLVVVKDDDFEECTRLINKYIPDTPVKEDRGTEITYNLINDYSYAFEEMLN  
168 DLECNMEKIKYKNYGLTATTLEDVFMSVGSDLAPVNNSDNDDAVTTTTDSTIDDILKHEL  
169 DSSLEELDRDESNVTGFRLCQQVLAVWMKKGLTLIRSPWLMILQFFAPVILINATLGVM  
170 RYVMSLTPTIRSRFLSLTEGFTSTETLLSFNGTLGSSVGAIAAAAAYEMMFTASDVENMGV  
171 TRIGNVPMDEYYLNRTMDPVVMGQLRHQILIGSTFDDNNATLWFSNFGYHDVAIALSTFH  
172 SAFLRAFNSTAQLNVYNHPLEATYRDQTDMMQMMIAMLSMQLSSGIGSSVSIVSAVFIMFF  
173 IKERTSGAKLLQKAAGVQPAVLWGSAAVFNWAWFLITCVSIVITCAAFQVIGLSTAQELA  
174 RMYLCVMLYGAAMLPLVYILSFAFNGPAVGFVGYFNMNVLFMMGAQIVEALSSPQLNTA  
175 EAANILDYILQFFPLYSLITAVRFLNQQVGLREYTCMQCEYYQAVSPNLQCTMESLCSRN  
176 EECCVEPNVYFKWNQPGVSRYLTSMIISCIVFWTILMIIIEYRVFQKLCTIKKTPPLDES  
177 ILDEDVQKEAQRARNVLPSSQRYEHALIANDSLKYYGKHLAVNQISFGVNDGECFGLLGVN

178 GAGKTTTFKMLMGDESISSGEAFVSGHSVEKSLGKVHQNIGYCPQFDALFGELTGRETLH  
179 MFAMMKGLRLRSAAPTAETLAHALGFLKHLDKRVNQYSSGGTKRKLNTAIAFLGRTRLVFN  
180 DEPTTGVDPAAKRHVWRATRQVQRAGRGVVLTSMSMEECEALCSRLTIMVNGRFQCFGTP  
181 QHLKNKFSEGFHVNYGDYKDDDDK  
182 **>Sf.SR-C**  
183 MFIKCLLFLFVLSFIEADFYYPASTCPMRRRIKNGRARPRQRGTFIKFSCSPRYTLVGNKY  
184 ATCRFGQWDVPAPVCVKSGCSQLQEVENSVNMTYHNNAWVFFCLPGHQLIGSPVYCDG  
185 SNWNSTVPGCRDSSAKVSTECDFELPDLCGWKPDELHDFDWRRLNKKTPSSFLQTGPSYD  
186 HTYGKNGSGYYMYIETTGRTENETARLLSPVYDAELAKNGCFIFYHMYGRGMGGLRVYQ  
187 KPDRVPMYQLLSSSKRNMYLLFEQWGDQGNWYSSASMLTDVDDDFQIVIEGIRGNSFMS  
188 DIAIDVSIQRGENCTKAMLEATTPPAVLQESCVGRCDLYAEATGYRGCSCSIVCVVTQN  
189 CCPDFLDVCDLDGISLSDARGSSSTAALPQTQKLIATTPDGNELSDATTATTKVTVPT  
190 TTSTKRPITRSTTTSTTTKRPPIIIKRPTTTTKTTVTKSTTTLSPRTTTAYPRTTTST  
191 PKPTPKPTPKPTPKTTPKPTTSSKPTTVTTSTVTVSSKPLTMPIEVSAVTEGTSMTTKQ  
192 GTQEYLAKKSGGLSGATLAVTVIIAIAATFGLVWLAIVLTRSRGLAALARIRGRATSDPE  
193 VHLYKSDVDDE  
194  
195

196 **Supplementary Figure 7.**

| FAW proteins | Unique peptides identified [pcs] | Corresponding sequence coverage [%] |
|--------------|----------------------------------|-------------------------------------|
| APN1         | 49                               | 61                                  |
| APN9         | 19                               | 29                                  |
| ABCb1        | 15                               | 26                                  |
| ABCa3        | 3                                | 4                                   |
| ABCc2        | 31                               | 23                                  |
| ABCc3        | 6                                | 5                                   |

197

198

199

200

201 **FIGURE LEGENDS**

202

203 **SUPPL. FIG 1. Amino acid sequence of the chimeric Cry1B.868 protein.** Segments  
204 of the Cry1Be2, Cry1Ca1, and Cry1Ab3 sequences comprising Cry1B.868 are  
205 highlighted in red.

206 **SUPPL. FIG 2. Concentration-response feeding assays demonstrating insecticidal**  
207 **activity of Cry1B.868 toward fall armyworm (FAW), *Spodoptera frugiperda*.**

208 Symbols are as follows, red circle, percent of dead insects; green square, percent of  
209 FAW larvae that have not molted to 2<sup>nd</sup> instar stadium; blue triangle, percent of FAW  
210 larvae that have not molted to 3<sup>rd</sup> instar stadium.

211 **SUPPL. FIG 3.** Specific insecticidal activity of the parent, Cry1Be2, and chimeric  
212 Cry1B.868 proteins on FAW.

213 **SUPPL. FIG 4. Amino acid sequence of the chimeric Cry1Da.844 and Cry1Da\_7**  
214 **proteins.** Segments of the Cry1Da1 and Cry1Ab3 sequences comprising Cry1Da.844  
215 (A-C) as well as the three amino acid substitutions in Cry1Da\_7 (D) are highlighted in  
216 red.

217 **SUPPL. FIG 5. Specific insecticidal activity of the modified Cry1Da\_7. (A)**

218 Assessment of the specific activity improvement against CEW via comparative analysis  
219 between Cry1Da and the modified Cry1Da\_7, **(B)** FAW activity of 345 ng/cm<sup>2</sup> Cry1Da\_7  
220 before and after removing the protoxin domain via trypsin treatment, **(C)** FAW activity of  
221 the 345 ng/cm<sup>2</sup> Cry1Da\_7 active core outfitted with Cry1Da vs. Cry1Ab protoxin domain  
222 (PTX).

223 **SUPPL. FIG 6. FAW receptor sequences.**

224 **SUPPL. FIG 7. Proteomics data analysis indicating the presence of relevant *Bt***  
225 **receptors in the FAW BBM sample.** The columns indicate the protein ID, the number  
226 of unique peptides identified by proteomics and the corresponding percent of coverage  
227 in the full-length receptor sequence.

228

229

230
